# Supplementary material for: Co-emission of volcanic sulfur and halogens amplifies volcaniceffective radiative forcing
Source: Copernicus journal article supplement (doi:10.5194/acp-2020-1110), 2020-11-06
Supplement: Supplementary file 1 [file acp-2020-1110-supplement.pdf]

# Supplementary Information for “Co-emission of volcanic sulfur and halogens amplifies volcanic effective radiative forcing”

John Staunton-Sykes<sup>\*1</sup>, Thomas J. Aubry<sup>2,4</sup>, Youngsub M. Shin<sup>1</sup>, James Weber<sup>1</sup>, Lauren R. Marshall<sup>1</sup>,  
5 Nathan Luke Abraham<sup>1,3</sup>, Anja Schmidt<sup>1,2</sup>, Alex Archibald<sup>1,3</sup>

<sup>1</sup>Centre for Atmospheric Science, Department of Chemistry, University of Cambridge, Cambridge, UK

<sup>2</sup>Department of Geography, University of Cambridge, Cambridge, UK

<sup>3</sup>National Centre for Atmospheric Science, UK

10 <sup>4</sup>Sidney Sussex College, Cambridge, UK

Correspondence to: J. Staunton-Sykes (email:jjas3@cam.ac.uk)

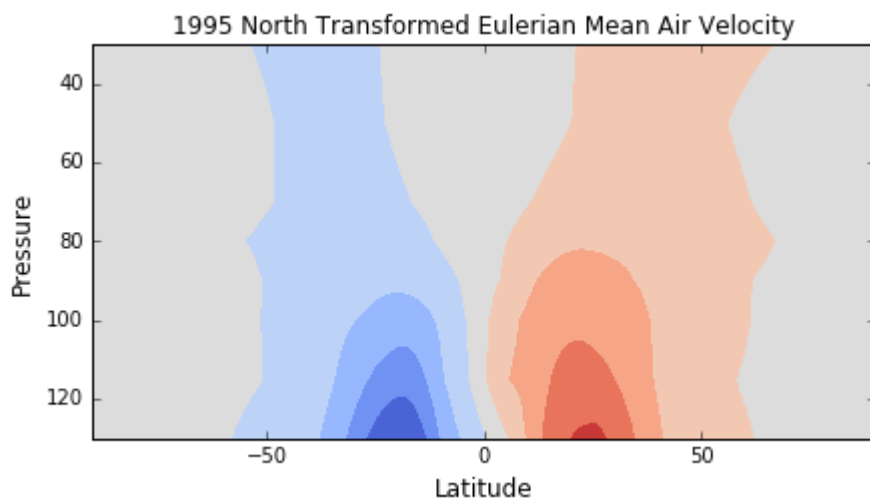

15 **Figure S1.** Northward transformed eulerian mean air velocity ( $\text{ms}^{-1}$ ) for the control simulation, averaged over the full 20 years. The poleward velocity reduces with altitude.

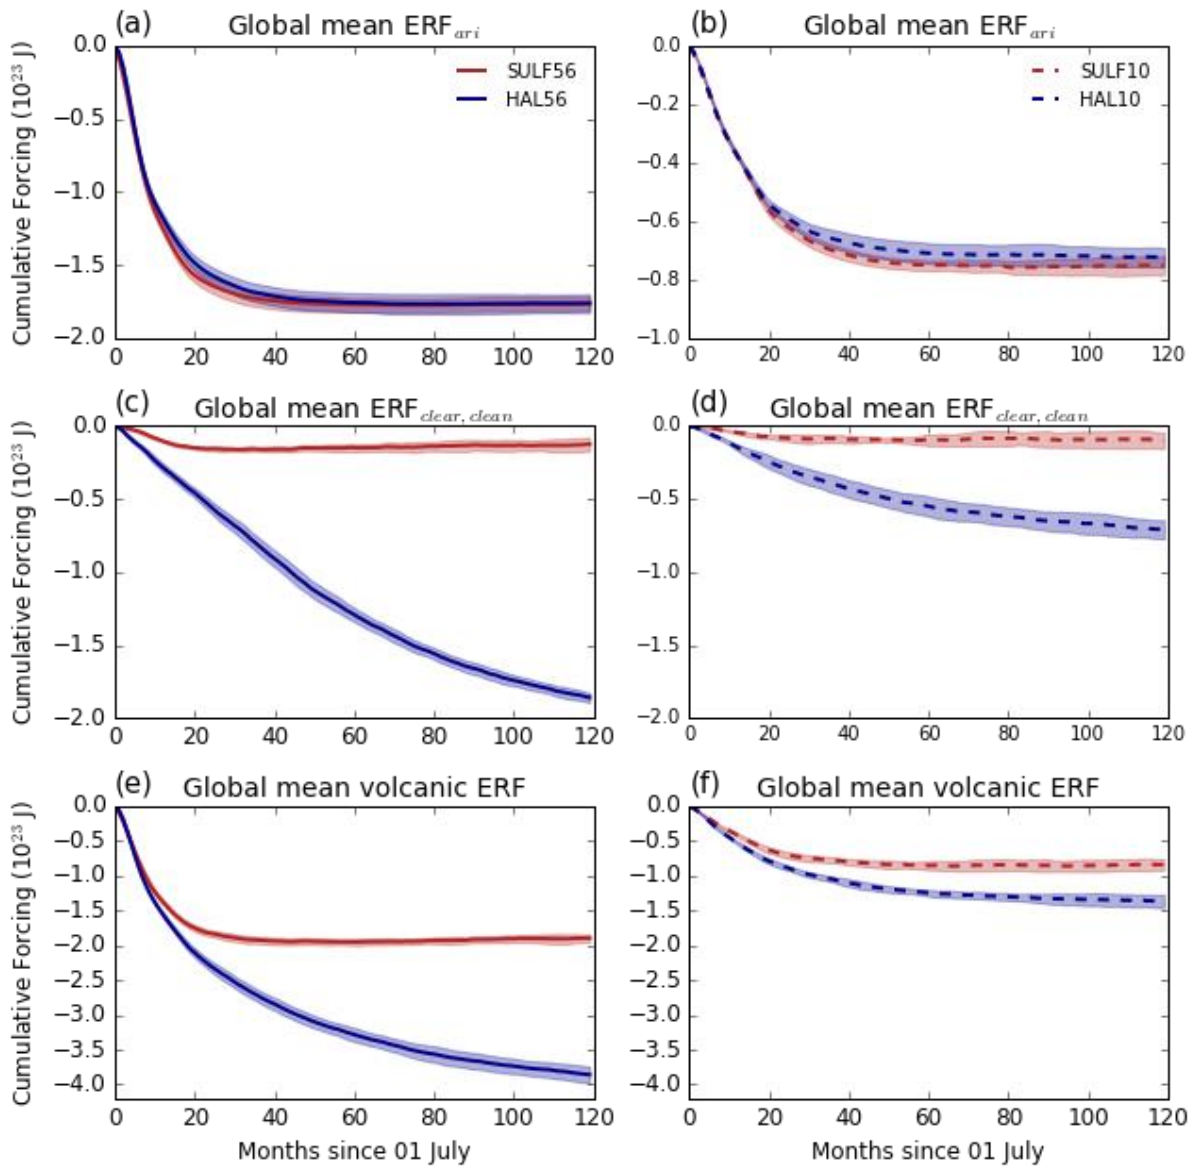

20 **Figure S2.** Cumulative global mean TOA  $ERF_{ari}$  in SULF56 & HAL56 (a) and SULF10 & HAL10 (b),  $ERF_{clear, clean}$  in SULF56 & HAL56 (c) and SULF10 & HAL10 (d), Volcanic ERF in SULF56 & HAL56 (e) and SULF10 & HAL10 (f),

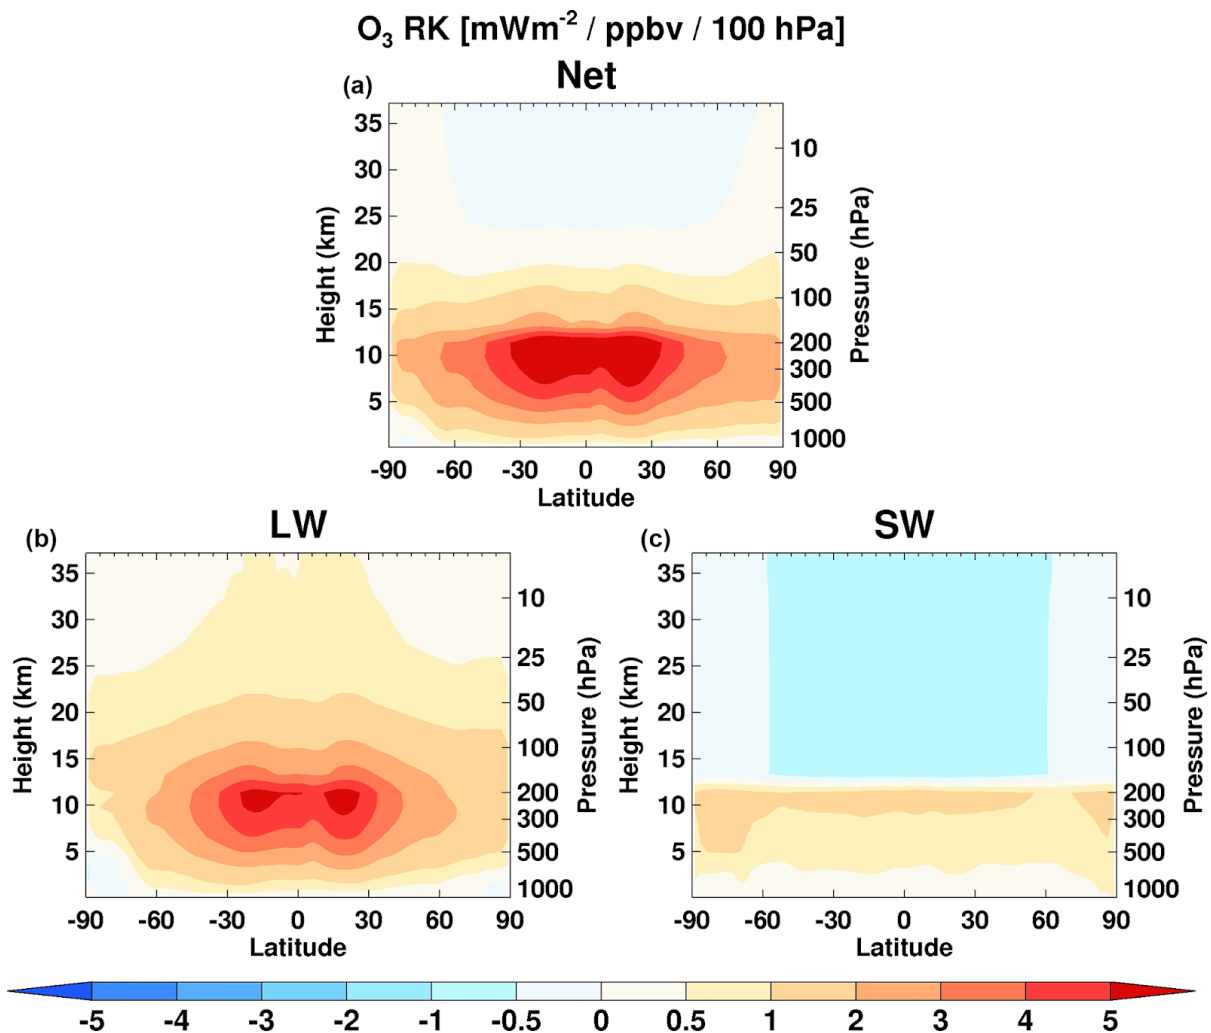

25 **Figure S3.** Annual zonal mean whole atmosphere ozone radiative kernel from (Rap et al., 2015) under all-sky conditions for (a) net (LW + SW), (b) LW, and (c) SW components. Figure taken from Iglesias-Suarez et al. (2018).

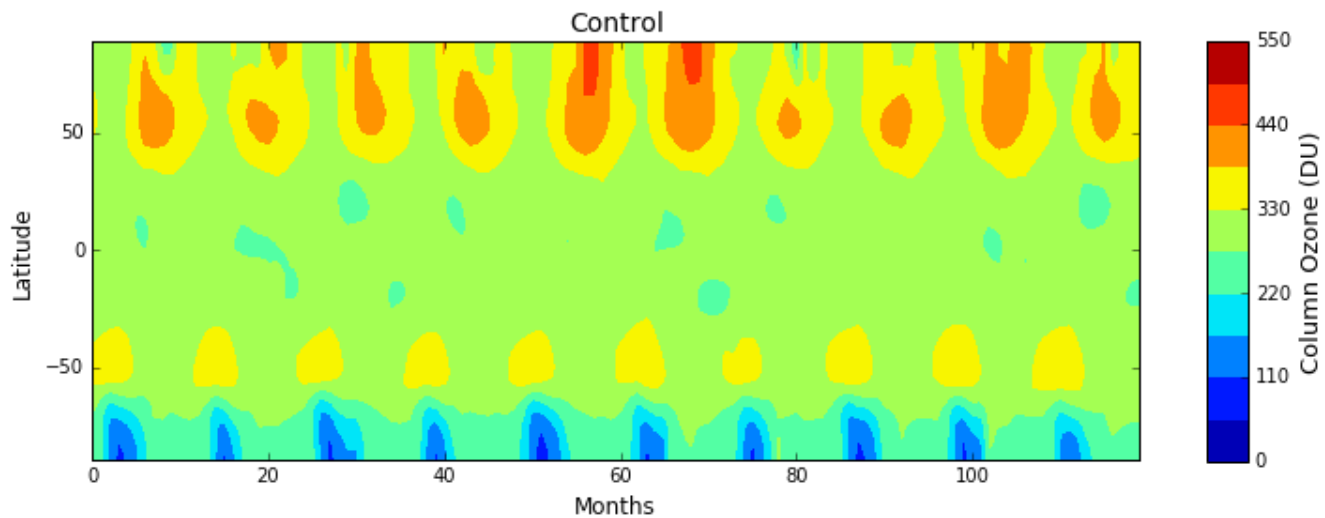

30 **Figure S4** Zonal mean column ozone in the control simulation. Ozone hole conditions are simulated when the column ozone  $< 220$  DU.
